# Supplementary material
Source: PubMed Central journal article supplement (PMC5795073)
Supplement: AEM.02246-17_zam004188312s1.pdf [file AEM.02246-17_zam004188312s1.pdf]

1 **Supplementary data**

2

3 **NMR analysis**

4 Samples of compound **3**, **8** and **13** were dissolved in 0.300 ml DMSO, next 0.300 ml of  
5 CDCl<sub>3</sub> were added and the solution was transferred to a 5 mm NMR tube. NMR spectra  
6 were recorded on an Agilent Technologies 400-MR (400/54 Premium Shielded)  
7 spectrometer (400 MHz), Bruker Ascend 700 MHz NMR spectrometer or on a Bruker  
8 Ascend 600 MHz NMR spectrometer at 300K and at low temperature (260 K) with water  
9 suppression by means of the standard Bruker pulse program zgcprr. An inter pulse  
10 delay of 10 s was chosen for the <sup>1</sup>H spectra to ensure quantitative comparison of signal  
11 integrals. All <sup>13</sup>C-NMR spectra are 1H-broadband decoupled.

12 COSY, TOCSY, HSQC and HMBC spectra for assignments of signals were recorded  
13 with standard Bruker pulse sequences. Chemical shifts are expressed relative to:

14 In DMSO-d<sub>6</sub>: <sup>1</sup>H δDMSO = 2.55, <sup>13</sup>C δDMSO = 39.5;

15 In CDCl<sub>3</sub>: <sup>1</sup>H δTMS = 0.00, <sup>13</sup>C δCDCl<sub>3</sub> = 77.0;

16 In MeOD: <sup>1</sup>H δMeOH = 3.31, <sup>13</sup>C δMeOD = 49.0;

17

18

19

20

21

22 **Synthesis of compound 14 and 15**

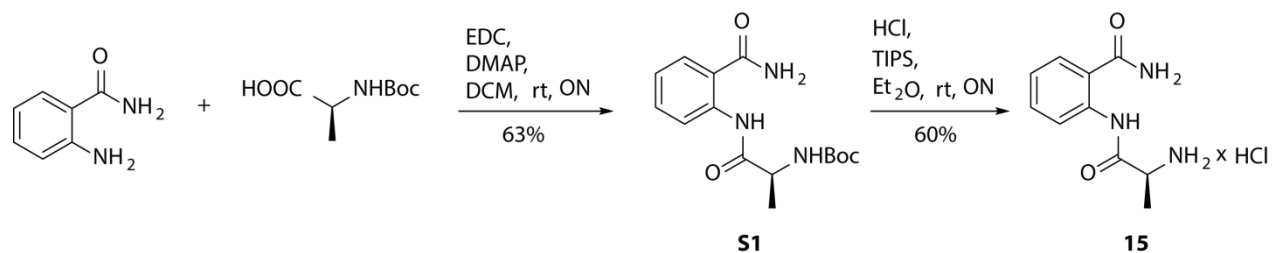

24 **S1: *tert*-Butyl (S)-(1-((2-carbamoylphenyl)amino)-1-oxopropan-2-yl)carbamate.** A

25 solution of anthranilamide (1.00 mmol, 126 mg), *N*-Boc-L-alanine (1.00 mmol, 189 mg)

26 and dimethylaminopyridine (0.2 mmol, 25 mg) in DCM (4 mL) was stirred at rt. EDC

27 (1.10 mmol, 210 mg) was added in one portion and the stirring continued overnight. The

28 reaction mixture was diluted with ethyl acetate (80 mL) and washed with 1N HCl (3 x 60

29 mL), sat. aq. NaHCO<sub>3</sub> (3 x 60 mL) and brine (60 mL). The organic phase was dried

30 (MgSO<sub>4</sub>) and the solvent volume was reduced. Addition of pentane resulted in

31 precipitation of product as a white powder (192 mg, 63 %). *R<sub>f</sub>* = 0.56 (pentane / AcOEt,

32 1:1, v/v); Mp. 76-78 °C; <sup>1</sup>H NMR (400 MHz, DMSO-d<sub>6</sub>): δ 1.26 (d, <sup>3</sup>*J* = 7.2 Hz, 3H,

33 CH<sub>3</sub>CH), 1.39 (s, 9H, (CH<sub>3</sub>)<sub>3</sub>C), 3.85-3.96 (m, 1H, CH<sub>3</sub>CH), 7.09 (app t, <sup>3</sup>*J* = 7.6 Hz, 1H,

34 ArH), 7.45 (br s, 1H, NH), 7.46 (app t, <sup>3</sup>*J* = 7.6 Hz, 1H, ArH), 7.56 (br s, 1H, NH), 7.76 (d,

35 <sup>3</sup>*J* = 8.0 Hz, 1H, ArH), 8.18 (br s, 1H, NH), 8.51 (d, <sup>3</sup>*J* = 8.4 Hz, 1H, ArH), 11.99 (s, 1H,

36 NH); <sup>13</sup>C NMR (100 MHz, DMSO-d<sub>6</sub>): δ 17.8, 28.7, 52.1, 78.8, 120.3, 120.3, 122.8, 129.0,

37 132.5, 139.8, 155.8, 170.8, 172.6; HRMS (ESI+) calc. for [M+H]<sup>+</sup> (C<sub>15</sub>H<sub>22</sub>N<sub>3</sub>O<sub>4</sub>):

38 308.1604, found: 308.1606.

39 **15: (S)-2-(2-aminopropanamido)benzamide hydrochloride.** To a solution of

40 compound **S1** (0.55 mmol, 170 mg) and tri-*iso*-propylsilane (0.60 mmol, 123 μL) in Et<sub>2</sub>O

41 (10 mL) was added 2M HCl in Et<sub>2</sub>O (10 mL). The resulting solution was stirred at rt

42 overnight. A precipitate was formed, which was filtered and washed with excess Et<sub>2</sub>O to  
 43 give, after drying *in vacuo*, a white powder (80 mg, 60%). <sup>1</sup>H NMR (400 MHz, CD<sub>3</sub>OD): δ  
 44 1.63 (d, <sup>3</sup>J = 7.2 Hz, 3H, CH<sub>3</sub>CH), 4.16 (q, <sup>3</sup>J = 7.2 Hz, 1H, CH<sub>3</sub>CH), 7.21 (app t, <sup>3</sup>J = 7.6  
 45 Hz, 1H, ArH), 7.52 (app t, <sup>3</sup>J = 7.6 Hz, 1H, ArH), 8.00 (d, <sup>3</sup>J = 8.0 Hz, 1H, ArH), 8.38 (d,  
 46 <sup>3</sup>J = 8.0 Hz, 1H, ArH); <sup>13</sup>C NMR (100 MHz, CD<sub>3</sub>OD): δ 15.7, 49.9, 120.8, 121.2, 123.7,  
 47 128.8, 132.2, 138.2, 167.4, 171.9; HRMS (ESI+) calc. for [M+H]<sup>+</sup> (C<sub>10</sub>H<sub>14</sub>N<sub>3</sub>O<sub>2</sub>):  
 48 208.1080, found: 208.1081.

49

50

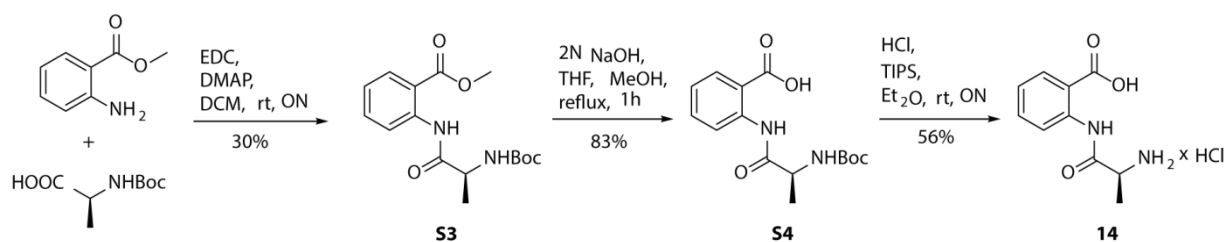

53 **S3: Methyl (S)-2-(2-((tert-butoxycarbonyl)amino)propanamido)benzoate.** A solution  
 54 of methyl 2-aminobenzoate (2.00 mmol, 302 mg) and *N*-Boc-L-alanine (2.00 mmol, 378  
 55 mg) in DCM (8 mL) was stirred at rt. EDC (2.20 mmol, 421 mg) was added in one portion  
 56 and the stirring continued overnight. The reaction mixture was diluted with ethyl acetate  
 57 (80 mL) and washed with 1N HCl (3 x 60 mL), sat. aq. NaHCO<sub>3</sub> (3 x 60 mL) and brine  
 58 (60 mL). The organic phase was dried (MgSO<sub>4</sub>) and the solvent volume was reduced.  
 59 Addition of pentane resulted in precipitation of product as a white powder (190 mg, 30  
 60 %). Mp. 114-115 °C; <sup>1</sup>H NMR (400 MHz, CDCl<sub>3</sub>): δ 1.45 (s, 9H, (CH<sub>3</sub>)<sub>3</sub>C), 1.47 (d, <sup>3</sup>J =  
 61 7.2 Hz, 3H, CH<sub>3</sub>CH), 3.89 (s, 3H, CH<sub>3</sub>O), 4.25-4.40 (m, 1H, CH<sub>3</sub>CH), 5.14 (br s, 1H,  
 62 NHBoc), 7.07 (app t, <sup>3</sup>J = 8.0 Hz, 1H, ArH), 7.52 (app t, <sup>3</sup>J = 8.0 Hz, 1H, ArH), 8.00 (d, <sup>3</sup>J

63 = 8.0 Hz, 1H, ArH), 8.69 (d,  $^3J = 8.4$  Hz, 1H, ArH), 11.50 (s, 1H, NH);  $^{13}\text{C}$  NMR (100  
64 MHz,  $\text{CDCl}_3$ ):  $\delta$  18.9, 28.3, 51.6, 52.3, 80.0, 115.3, 120.3, 122.7, 130.8, 134.6, 141.1,  
65 155.2, 168.4, 171.8; HRMS (ESI+) calc. for  $[\text{M}+\text{H}]^+$  ( $\text{C}_{16}\text{H}_{23}\text{N}_2\text{O}_5$ ): 323.1602, found:  
66 323.1599.

67 **S4: (S)-2-(2-((tert-butoxycarbonyl)amino)propanamido)benzoic acid.** To a solution  
68 of compound **S3** (0.50 mmol, 156 mg) in MeOH (12 mL) and THF (12 mL) was added  
69 2N aq. NaOH (4 mL). The resulting mixture was heated at reflux for 1 h. The volatiles  
70 were evaporated, the residue was redissolved in with ethyl acetate (30 mL) and washed  
71 with 1N HCl (2 x 20 mL) and brine (20 mL). The organic phase was dried ( $\text{MgSO}_4$ ) and  
72 the solvent volume was reduced. Addition of pentane resulted in precipitation of product  
73 as a white powder (128 mg, 83 %). Mp. 154-156 °C;  $^1\text{H}$  NMR (400 MHz,  $\text{DMSO-d}_6$ ):  $\delta$   
74 1.28 (d,  $^3J = 7.2$  Hz, 3H,  $\text{CH}_3\text{CH}$ ), 1.38 (s, 9H,  $(\text{CH}_3)_3\text{C}$ ), 3.90-4.02 (m, 1H,  $\text{CH}_3\text{CH}$ ), 7.12  
75 (app t,  $^3J = 7.6$  Hz, 1H, ArH), 7.51 (d,  $^3J = 6.4$  Hz, 1H,  $\text{NHBoc}$ ), 7.57 (app t,  $^3J = 7.6$  Hz,  
76 1H, ArH), 7.97 (d,  $^3J = 8.0$  Hz, 1H, ArH), 8.61 (d,  $^3J = 8.0$  Hz, 1H, ArH), 11.65 (s, 1H,  
77 NH);  $^{13}\text{C}$  NMR (100 MHz,  $\text{DMSO-d}_6$ ):  $\delta$  17.8, 28.6, 52.2, 78.9, 116.5, 119.8, 123.0,  
78 131.6, 134.6, 141.2, 155.9, 169.6, 172.9; HRMS (ESI+) calc. for  $[\text{M}+\text{H}]^+$  ( $\text{C}_{15}\text{H}_{21}\text{N}_2\text{O}_5$ ):  
79 309.1445, found: 309.1440.

80 **14: (S)-2-(2-aminopropanamido)benzoic acid hydrochloride.** To a solution of  
81 compound **S4** (0.39 mmol, 120 mg) and tri-*iso*-propylsilane (0.50 mmol, 108  $\mu\text{L}$ ) in  $\text{Et}_2\text{O}$   
82 (5 mL) was added 2M HCl in  $\text{Et}_2\text{O}$  (5 mL). The resulting solution was stirred at rt  
83 overnight. A precipitate was formed, which was filtered and washed with excess  $\text{Et}_2\text{O}$  to  
84 give, after drying *in vacuo*, a white powder (53 mg, 56%).  $^1\text{H}$  NMR (400 MHz,  $\text{CD}_3\text{OD}$ ):  $\delta$   
85 1.66 (d,  $^3J = 7.2$  Hz, 3H,  $\text{CH}_3\text{CH}$ ), 4.23 (q,  $^3J = 7.2$  Hz, 1H,  $\text{CH}_3\text{CH}$ ), 7.21 (app t,  $^3J = 7.6$

86 Hz, 1H, ArH), 7.59 (app t,  $^3J = 7.6$  Hz, 1H, ArH), 8.10 (d,  $^3J = 8.0$  Hz, 1H, ArH), 8.51 (d,  
87  $^3J = 8.4$  Hz, 1H, ArH);  $^{13}\text{C}$  NMR (100 MHz,  $\text{CD}_3\text{OD}$ ):  $\delta$  15.7, 50.0, 116.7, 120.3, 123.4,  
88 131.2, 133.9, 140.0 167.6, 169.9; HRMS (ESI+) calc. for  $[\text{M}+\text{H}]^+$  ( $\text{C}_{10}\text{H}_{13}\text{N}_2\text{O}_3$ ):  
89 209.0921, found: 209.0916.

90

91

92

93

94

95

96

97

98

99

100

101

102

103

104

105

106

107

108

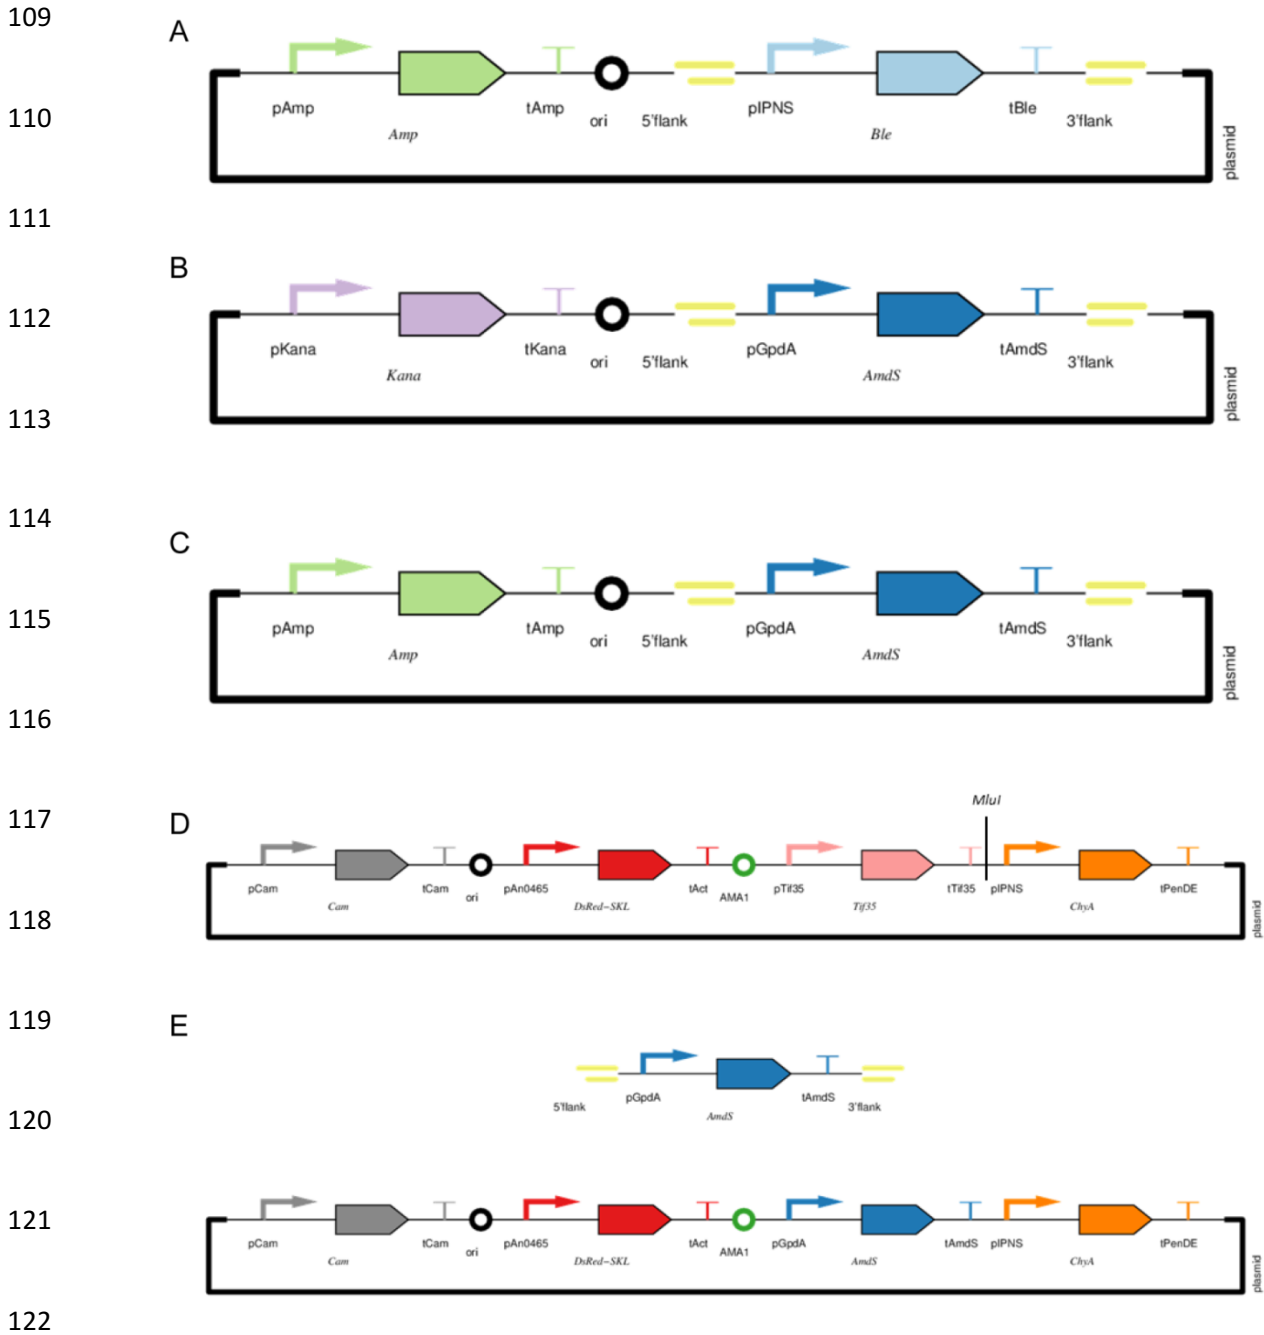

123 **Figure S1.** SBOL (Synthetic Biology Open Language) presentation of deletion plasmids  
 124 for *chyA*, *chyE* (A), *chyC*, *chyD* (B), *chyH*, *chyM* and *Pc21g12640* (C). SBOL  
 125 presentation of pDSM108\_AV1 overexpressing *chyA* and *in vivo* repair cassette (D). *In*  
 126 *in vivo* recombined plasmid from D (E).

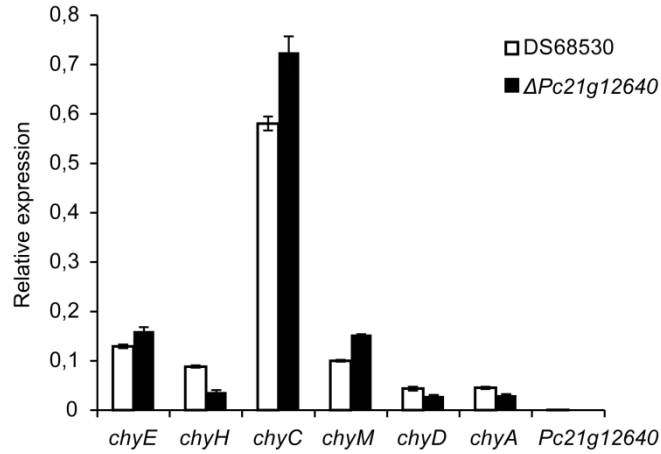

127

128 **Figure S2 Expression of the putative chrysoeine gene cluster in strain DS68530**  
 129 **and  $\Delta Pc21g12640$ .** RNA was isolated after 48 h of growth in a SMP medium. Data are  
 130 expressed relative to actin and represented as mean  $\pm$  SEM.

131

132

133

134

135

136

137

138

139

140

141

142

143

144

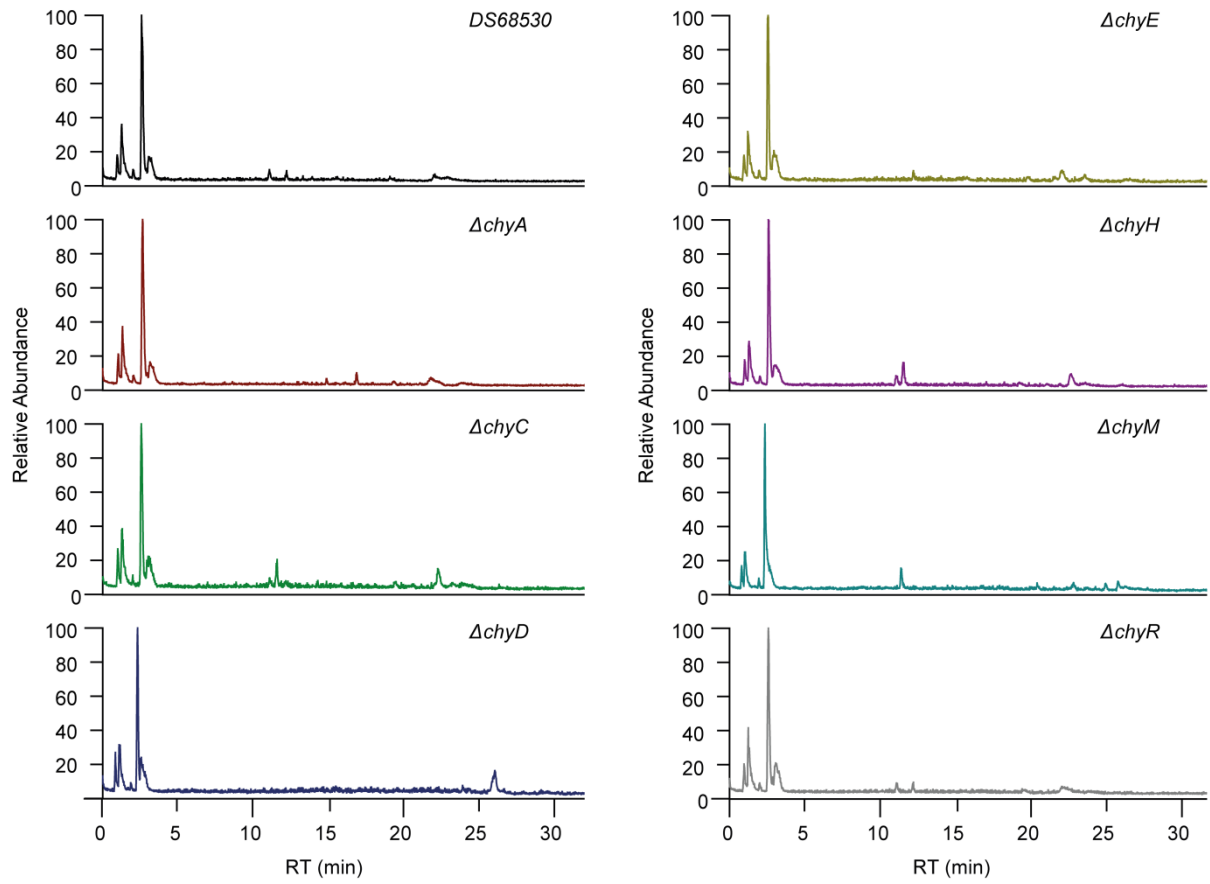

145

146

147 **Figure S3. Chromatograms of culture broth from DS68530 (wild-type) and**

148 **indicated gene deletion strains after 96 h of growth in a SMP medium.**

149

150



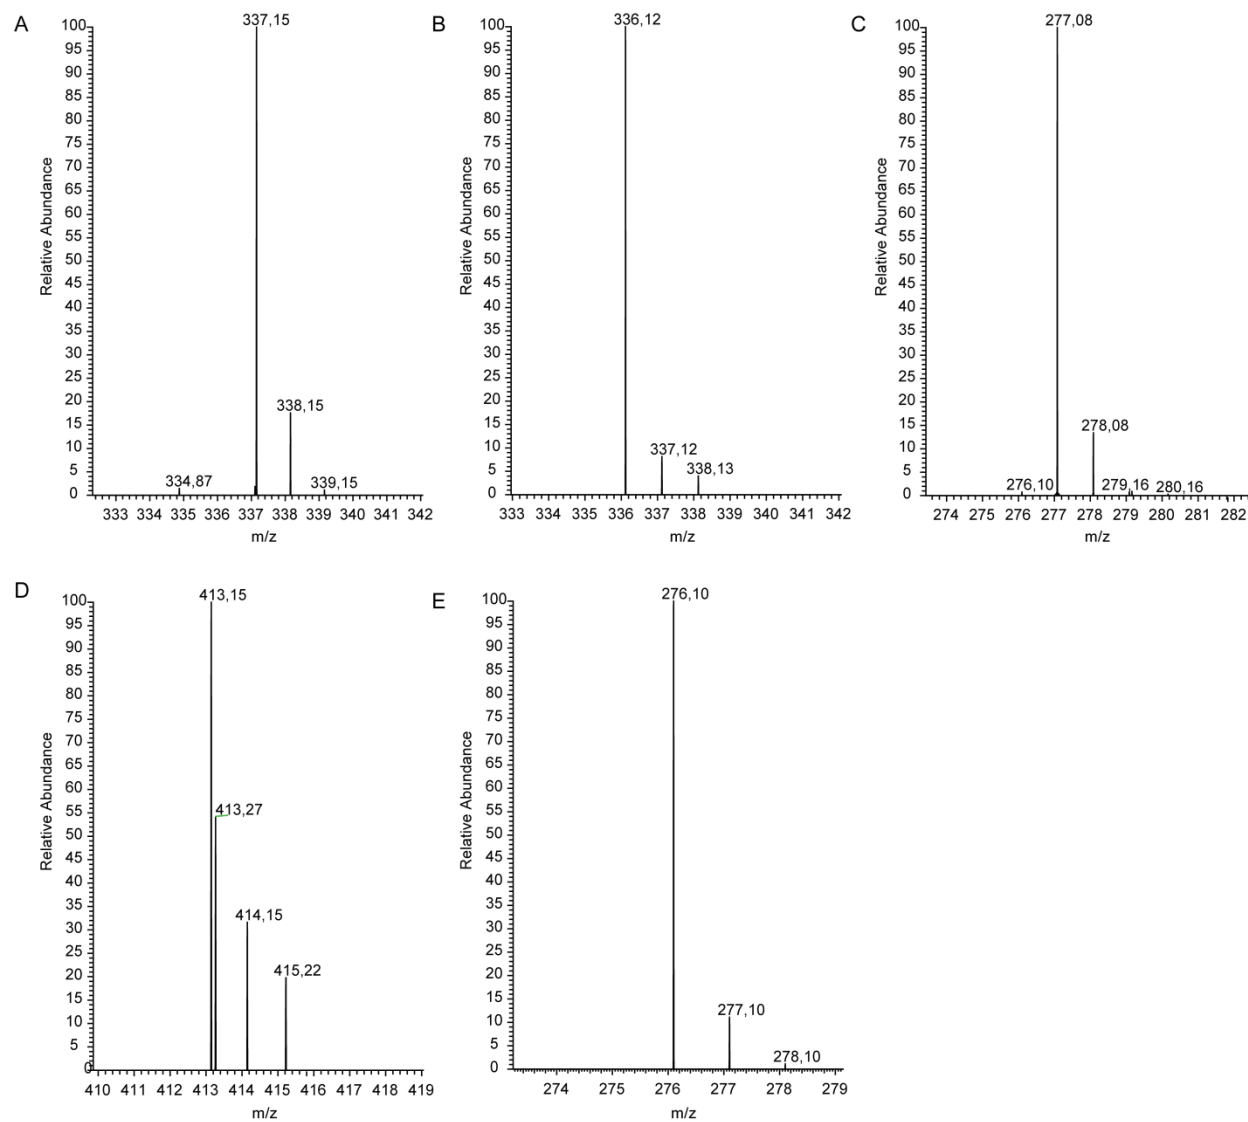

151  
 152 **Figure S4. Mass spectra of uncharacterized chrysoeine related compounds.**  
 153 Compound **5** (A), compound **6** (B), compound **7** (C), compound **9** and **10** (D), compound  
 154 **12** (E).

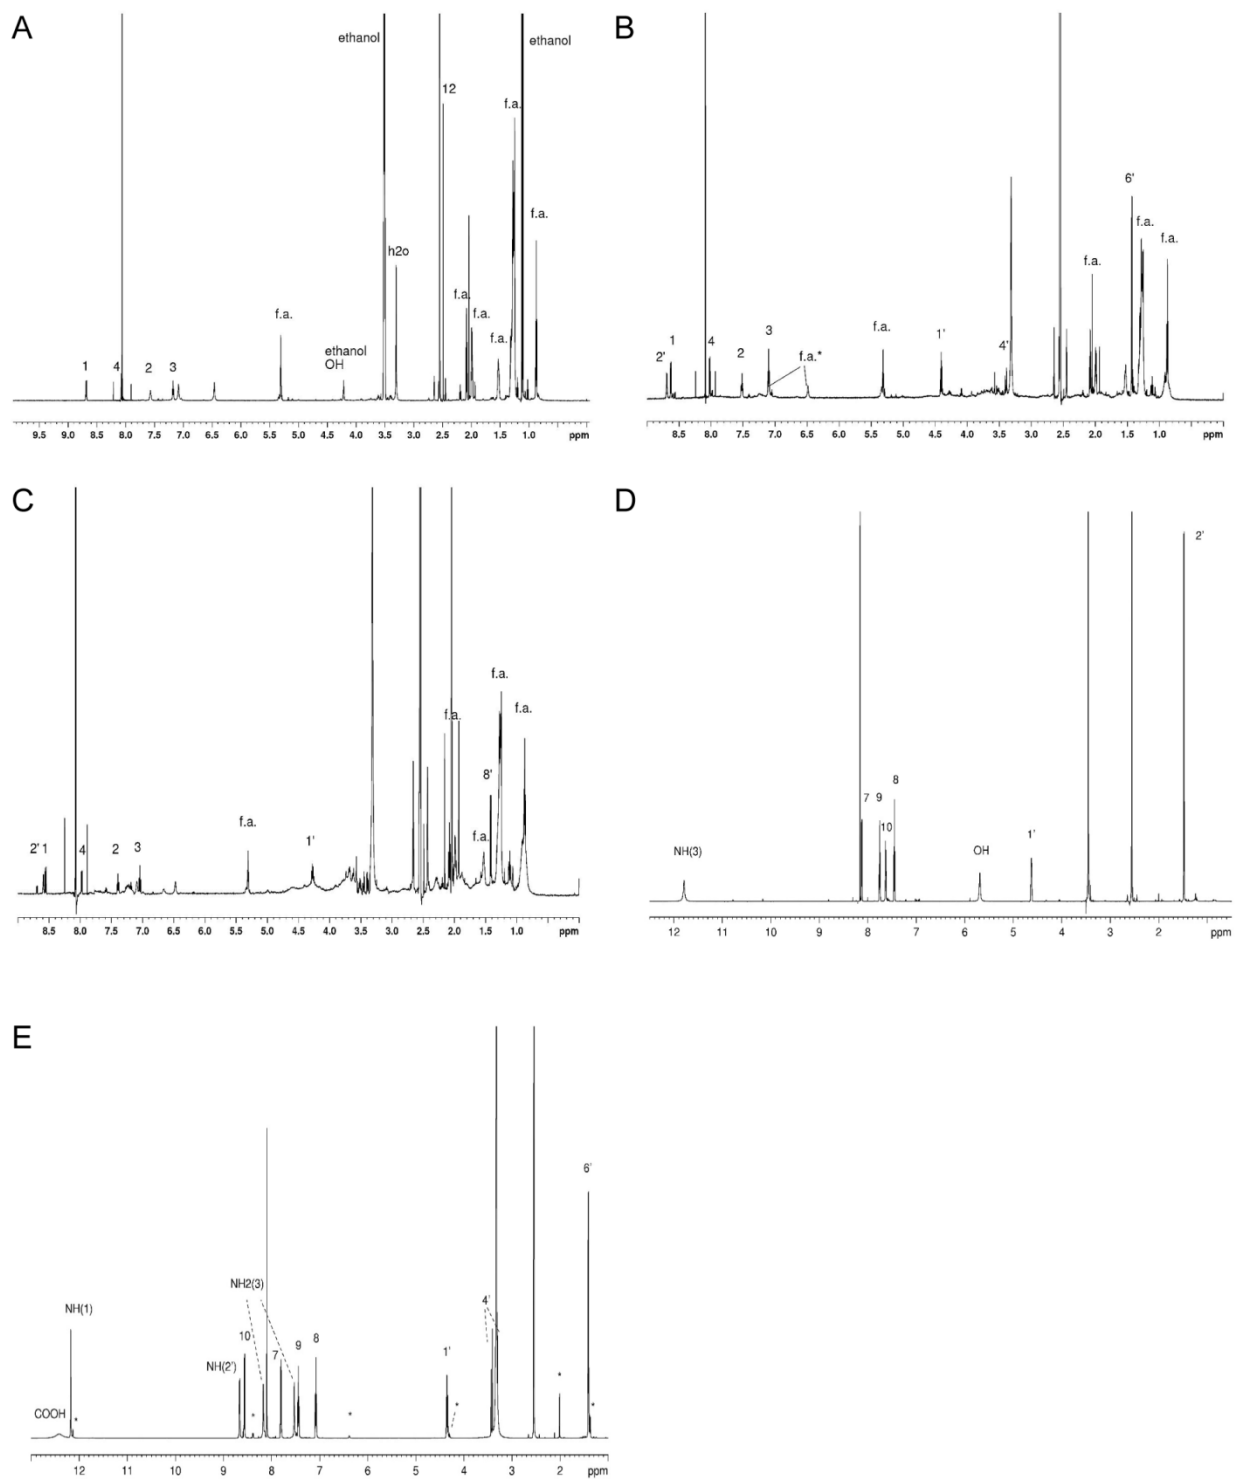

155  
 156 **Figure S5.**  $^1\text{H}$  NMR spectrum of compound **3** (A), compound **8** (B), compound **13** (C),  
 157 compound **1** (D), compound **4** (E). Compound **2** was observed as a minor impurity in this  
 158 fraction. Signals are labelled with \*.

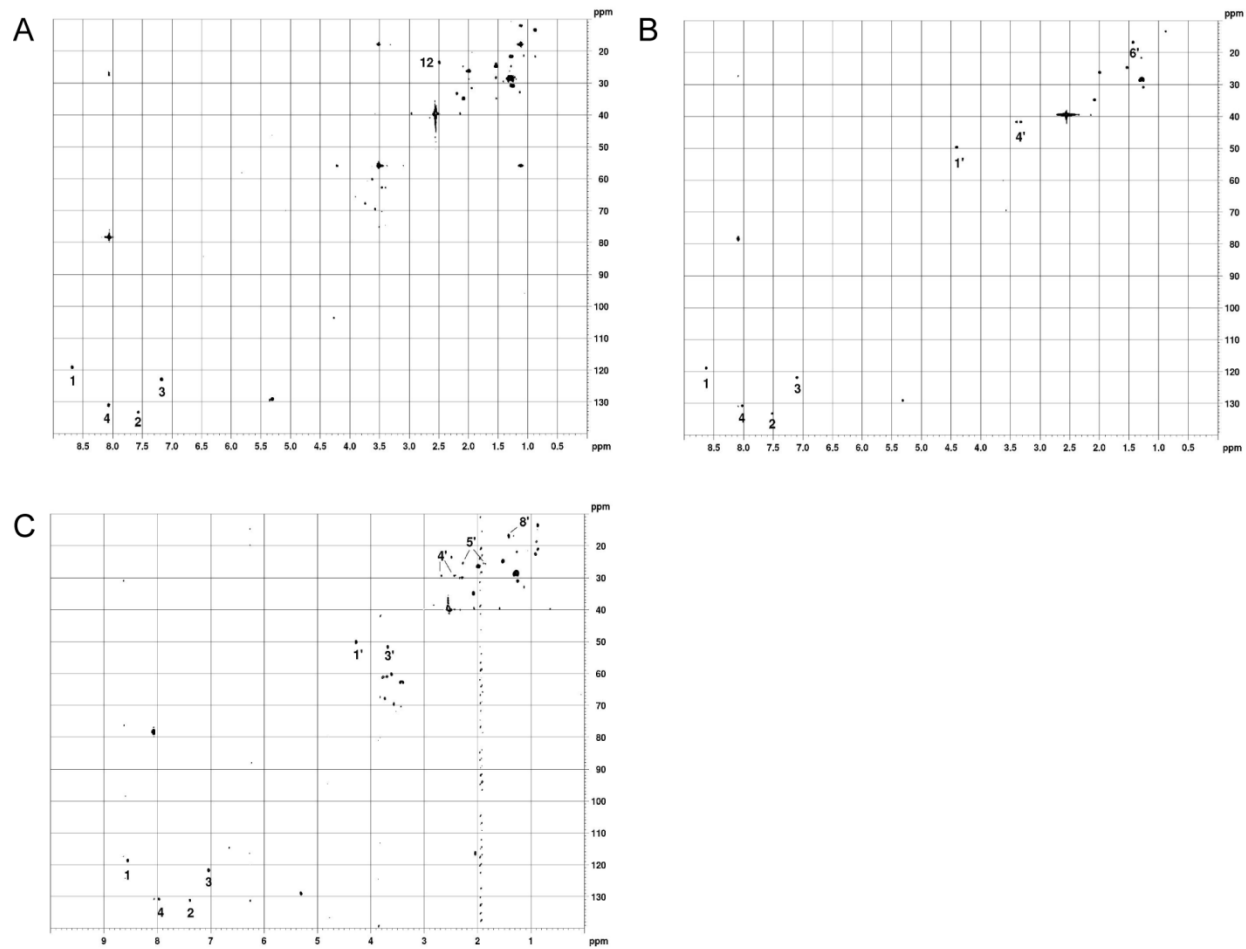

159

160 **Figure S6.** HSQC spectrum of compound **3** (A), compound **8** (B) and **13** (C).

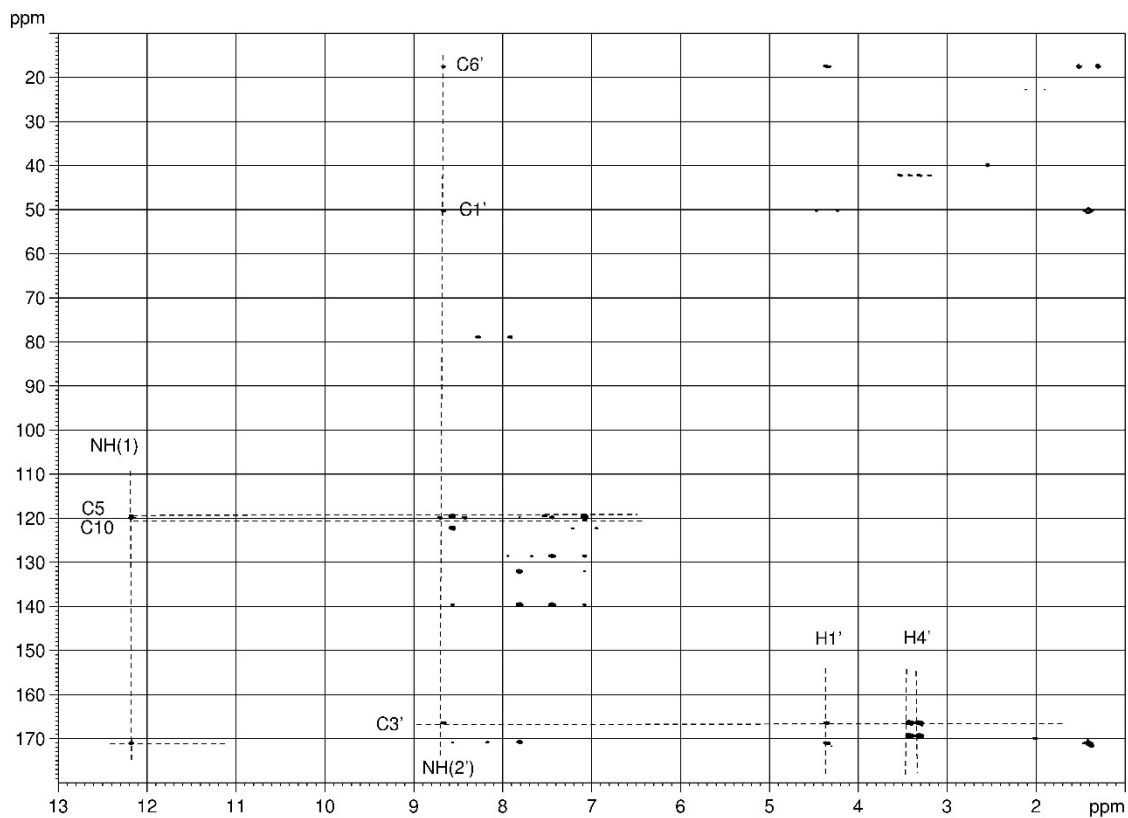

161

162 **Figure S7.** HMBC spectrum of compound **4** and impurity compound **2**.

163

164

165

166

167

168

169

170

171

172

173

174

175

176

177

178

179

180

181

182

183

184

185

186

187

188

189

190

191

192

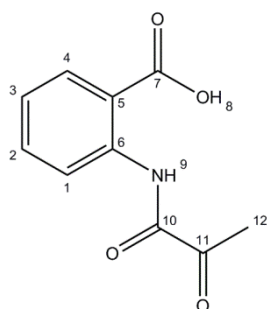**3**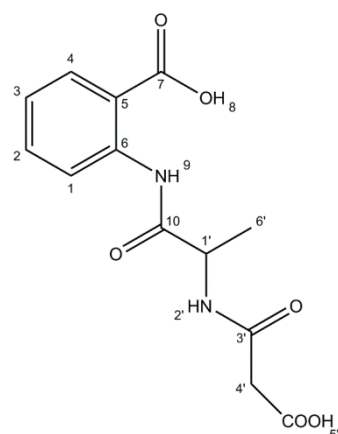**8**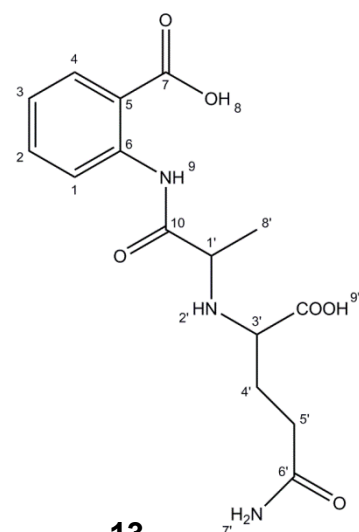**13**

|    | <sup>1</sup> H | <sup>13</sup> C | <sup>1</sup> H | <sup>13</sup> C | <sup>1</sup> H  | <sup>13</sup> C |
|----|----------------|-----------------|----------------|-----------------|-----------------|-----------------|
| 1  | 8.69           | 119.1           | 8.63           | 118.9           | 8.56            | 118.7           |
| 2  | 7.57           | 133.2           | 7.52           | 133.1           | 7.39            | 131.2           |
| 3  | 7.18           | 122.9           | 7.10           | 122.0           | 7.04            | 121.7           |
| 4  | 8.07           | 131.0           | 8.02           | 130.7           | 7.97            | 130.8           |
| 5  | -              | 119.5           | -              | 119.4           | -               | n.o.            |
| 6  | -              | 139.1           | -              | 140.4           | -               | 138.8           |
| 7  | -              | 168.9           | -              | 169.3           | -               | 168.9           |
| 8  | n.o.           | -               | n.o.           | -               | n.o.            | -               |
| 9  | 12.52          | -               | 12.01          | -               | 12.05           | -               |
| 10 | -              | 158.1           | -              | 170.9           | -               | 171.1           |
| 11 | -              | 195.6           |                |                 |                 |                 |
| 12 | 2.49           | 23.6            |                |                 |                 |                 |
| 1' |                |                 | 4.41           | 49.8            | 4.28            | 50.2            |
| 2' |                |                 | 8.69           | -               | 8.59            | -               |
| 3' |                |                 | -              | 166.2           | 3.69 (*)        | 51.7            |
| 4' |                |                 | 3.39 / 3.33    | 41.8            | 2.28 / 1.88 (*) | 25.4            |
| 5' |                |                 | -              | 169.0           | 2.68 / 2.44 (*) | 29.4            |
| 6' |                |                 | 1.43           | 16.8            | -               | 170.9           |
| 7' |                |                 |                |                 | n.o.            | -               |
| 8' |                |                 |                |                 | 1.42            | 16.9            |
| 9' |                |                 |                |                 | -               | 171.8           |

193 (\*) : multiplicities not resolved, -: not applicable, n.o.: not observed

194 **Table S1.** Chemical shifts of compound **3**, compound **8** and compound **13** in195 DMSO/CDCl<sub>3</sub> 1/1. δ DMSO = 39.5 / 2.55 ppm. Temperature = 300 K.

196

197

198

199

200

201

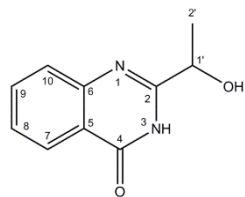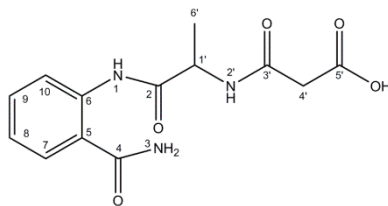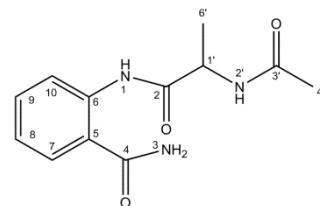**1****4****2**

|         | 280 K          |                 |                 | 300 K          |                 |                 | 300 K          |                 |                 |
|---------|----------------|-----------------|-----------------|----------------|-----------------|-----------------|----------------|-----------------|-----------------|
|         | <sup>1</sup> H | <sup>13</sup> C | <sup>15</sup> N | <sup>1</sup> H | <sup>13</sup> C | <sup>15</sup> N | <sup>1</sup> H | <sup>13</sup> C | <sup>15</sup> N |
| 1       | -              | -               | 231.2           | 12.18          | -               | 120.5           | 12.13          | -               | n.o.            |
| 2       | -              | 159.7           | -               | -              | 171.0           | -               | -              | n.o.            | -               |
| 3       | 11.79          | -               | 156.6           | 8.17 /<br>7.53 | -               | 108.4           | 8.15 /<br>7.48 | -               | n.o.            |
| 4       | -              | 161.7           | -               | -              | 170.8           | -               | -              | n.o.            | -               |
| 5       | -              | 121.3           | -               | -              | 119.4           | -               | -              | n.o.            | -               |
| 6       | -              | 148.5           | -               | -              | 139.6           | -               | -              | n.o.            | -               |
| 7       | 8.13           | 125.8           | -               | 7.81           | 128.2           | -               | 7.80           | n.o.            | -               |
| 8       | 7.46           | 126.0           | -               | 7.08           | 121.9           | -               | 7.07           | n.o.            | -               |
| 9       | 7.76           | 134.0           | -               | 7.44           | 131.6           | -               | 7.43           | n.o.            | -               |
| 10      | 7.63           | 126.9           | -               | 8.56           | 119.5           | -               | 8.59           | n.o.            | -               |
| 1'      | 4.63           | 67.2            | -               | 4.35           | 49.7            | -               | 4.31           | n.o.            | -               |
| 2'      | 1.48           | 21.8            | -               | 8.67           | -               | 125.7           | 8.39           | -               | 125.3           |
| OH      | 5.69           | -               | -               | -              | -               | -               | -              | -               | -               |
| 3'      | -              | -               | -               | -              | 166.4           | -               | -              | n.o.            | -               |
| 4'      | -              | -               | -               | 3.42 /<br>3.08 | 41.8            | -               | 2.01           | 22.2            | -               |
| 5'      | -              | -               | -               | -              | 169.3           | -               | -              | -               | -               |
| 6'      | -              | -               | -               | 1.41           | 17.0            | -               | 1.38           | n.o.            | -               |
| 5' COOH | -              | -               | -               | 12.42          | -               | -               | -              | -               | -               |

202 -: not applicable, n.o.: not observed

203 **Table S2.** Chemical shifts of compound **1**, compound **4** and compound **2** in204 DMSO/CDCl<sub>3</sub> 1/1. δ DMSO = 39.5 / 2.55 ppm. Temperature = 280 K and 300 K.
